# Supplementary material for: Unexpected high NOX emissions from lakes on Tibetan Plateau under rapid warming
Source: Research Square preprint supplement (doi:10.21203/rs.3.rs-1980236/v1), 2022-09-02
Supplement: Supplementary file 1 [file 1de4aa593307bcacb4a3f7f7.xlsx]

## Sheet: TableS1
Geographic Information								Satellite Data				NOx Emission Retrieval			GHG Emissions			Validation of High NO2 VCDs over the Lakes on TP
Lake Name	ID in HydroLAKES database	Longitude (°E)	Latitude (°N)	Area (km2)	Average Depth (m)	Elevation (km)	Elevation Drop (km)	Mean VCDlake (JJA 2019) (molecules cm-2)	Mean VCDlake - Mean VCDsur (JJA 2019) (molecules cm-2)	PSNR (JJA 2019)	Chlorophyll Concentration (mg m3)	NOx Emission (JJA 2019) (10-2 kg N km-2 h-1)	NOx Emission Total (JJA 2019) (kg N h-1)	Uncertainty of NOx Emission Total (JJA 2019) (kg N h-1)	N2O Emission (10-2 kg N km-2 h-1)	CO2 Emission (kg C km-2 h-1)	CH4 Emission (kg C km-2 h-1)	Mean VCDlake (July 2019) (molecules cm-2)	Mean VCDlake (July 2019 high SR) (molecules cm-2)	Mean VCDlake (July 2019 low SR) (molecules cm-2)	PSNR (July 2019)	PSNR (July 2019 high SR)	PSNR (July 2019 low SR)
Qinghai	143	100.2	36.88	4266.55	16.8	3.18	1.37	0.88	0.09	3.52	3.09	5.59	238.7	26.98	0.1283	27.5	0.56	0.93	0.87	0.94	3.78	3.43	3.83
Siling	147	88.99	31.79	1749.53	28	4.51	0.82	0.87	0.25	8.45	0.7	10.37	181.49	18.44	nan	122.65	0.02	1.02	0.96	0.99	4.78	4.89	4.73
Nam	149	90.6	30.74	1963.82	44.4	4.7	2.03	0.89	0.22	5.46	0.66	10.64	208.91	22.25	1.995	nan	nan	1.14	1.09	1.12	5.45	5.27	5.48
Suhai	1331	93.88	38.87	102.62	8.2	2.79	1.93	0.67	0.07	2.94	16.24	2.5	2.56	2.22	0.875	nan	nan	0.8	0.79	0.79	3.2	3.42	3.36
Hala	1336	97.59	38.29	585.6	30	4.07	1.65	0.62	0.05	1.6	0.45	0.93	5.42	5.34	nan	nan	nan	0.67	0.62	0.65	1.84	1.84	1.91
Ayakkum	1344	89.39	37.55	616.34	10	3.84	1.7	0.8	0	2.75	2.36	6.89	42.44	11.42	0.56	nan	nan	0.77	0.71	0.78	3.04	2.79	3.61
-	1347	93.93	37.5	204.51	2.4	2.66	0.21	0.62	-0.01	2.03	nan	1.93	3.94	2.93	0.5133	nan	nan	0.66	0.6	0.66	3.45	3.14	4.12
Toson	1350	96.94	37.14	142.97	9.9	2.78	0.58	0.93	0.11	3.1	1.44	7.25	10.37	4.61	nan	nan	nan	0.9	0.83	0.89	4.14	3.7	4.49
Aqqikkol	1352	88.42	37.08	354.71	13.6	4.23	0.94	0.93	0.09	3.97	0.81	10.5	37.24	8.2	nan	nan	nan	1.17	1.06	1.15	4.02	3.76	4.28
-	1354	99.11	36.7	116.44	2.3	3.02	1.81	0.77	0.01	2	nan	2.97	3.46	3.04	nan	nan	nan	0.75	0.67	0.75	2.38	2	2.69
Arkatag	1357	89.41	36.35	225.85	4.1	4.7	0.9	0.79	0.08	3.35	nan	6.71	15.15	6.12	nan	nan	nan	0.84	0.79	0.84	2.26	2.35	2.6
-	1364	90.63	35.93	100.81	11	4.87	1.54	0.76	0.01	1.21	nan	1.59	1.6	3.32	nan	nan	nan	1.07	1.01	1.05	1.38	1.55	1.37
Lixi'Oidain	1366	90.2	35.75	220.78	16.7	4.86	0.57	0.79	0.01	1.69	0.88	5.25	11.6	6.33	nan	nan	nan	0.97	0.9	0.95	1.95	1.52	1.9
Hoh Sai	1367	92.86	35.74	261.4	16.6	4.47	1.18	0.64	0.02	2.4	0.52	2.62	6.86	4.24	0.28	nan	nan	0.7	0.65	0.7	2.67	2.63	2.66
Hoh Xil	1369	91.14	35.59	300.1	12.6	4.88	1.02	0.85	0.07	2.6	1.2	9.66	28.99	8.05	nan	nan	nan	0.95	0.9	0.95	3.19	3.25	3.12
Zonag	1370	91.92	35.55	255.38	14.7	4.74	0.92	0.72	0.02	1.76	3.28	5.09	13	5.63	nan	nan	nan	0.7	0.66	0.69	2.44	2.21	2.55
Donggi Cona	1371	98.55	35.3	231.17	42.7	4.07	1.03	0.75	0.02	3.46	1.39	3.96	9.15	4.42	nan	nan	nan	0.66	0.62	0.66	2.92	2.65	2.98
Dogaicoring Quang	1372	89.26	35.31	208.99	6.4	4.77	0.64	0.8	0.07	3.58	2.91	7.96	16.64	5.61	nan	nan	nan	0.9	0.83	0.9	2.81	2.96	3.03
Aksayquin	1373	79.84	35.21	165.96	9.6	4.83	1.07	0.99	0.06	2.46	4	9.3	15.43	4.11	nan	nan	nan	1.25	1.2	1.23	2.76	3.45	2.65
Xijir Ulan	1374	90.31	35.21	269.64	5.5	4.77	0.46	0.82	0.01	2.85	3.28	7.67	20.69	7.43	nan	nan	nan	0.91	0.85	0.89	1.72	1.52	1.87
Dorge	1375	92.14	35.22	198.59	16	4.66	0.7	0.71	0.01	3.2	5.36	4.01	7.96	4.6	0.525	nan	nan	0.65	0.61	0.64	2.41	2.22	2.64
Ngoring	1377	97.7	34.9	617.76	17.4	4.26	0.72	0.8	0.06	3.83	4.32	7.02	43.37	11.92	nan	18.4	0.2	0.74	0.7	0.74	2.84	2.85	2.92
Gozha	1378	81.07	35.02	248.04	35.7	5.07	1.3	0.8	0.13	2.4	0.58	4.43	11	4.42	nan	nan	nan	1.02	0.95	1	3.47	3.37	3.5
Bairab	1379	83.13	35.03	121.34	8	4.95	0.63	0.75	0	0.66	nan	3.95	4.8	2.85	nan	nan	nan	0.92	0.86	0.89	2.5	2.27	2.59
Bangdag	1382	81.56	34.95	107.02	8.5	4.89	0.95	0.76	0.05	1.41	nan	4.97	5.32	2.95	nan	nan	nan	0.91	0.83	0.9	1.25	1.11	1.31
Gyaring	1385	97.26	34.93	520.58	9	4.28	0.58	0.75	0.04	3.42	nan	5.11	26.62	9.73	nan	nan	nan	0.72	0.66	0.74	3.36	3.07	3.46
-	1386	90.44	34.83	372.84	19.3	4.86	0.51	0.8	0.05	2.75	0.56	7.47	27.84	8.15	nan	nan	nan	0.8	0.75	0.78	3.43	3.02	3.49
-	1387	90.63	34.75	108.03	7.2	4.86	0.49	0.77	0.03	1.39	nan	7.55	8.16	4.06	nan	nan	nan	0.82	0.75	0.84	1.57	1.34	2.06
Dogai Coring	1389	89.03	34.57	268.13	22.5	4.81	0.4	0.73	0.07	2.69	1.94	6.84	18.35	5.23	nan	nan	nan	0.72	0.66	0.72	2.31	2.18	2.25
Memar	1391	82.31	34.22	127.93	8	4.9	1.39	0.95	0.18	2.03	nan	8.73	11.16	3.31	nan	nan	nan	1.25	1.16	1.22	3.19	2.99	3.12
Chem	1395	79.78	34.16	113.96	20	4.93	1.71	0.52	-0.07	0.83	8.07	1.4	1.6	1.81	nan	nan	nan	0.59	0.56	0.6	1.37	1.54	1.23
Aru	1397	82.39	33.99	104.73	16.1	4.91	1.38	0.8	0.09	1.55	nan	3.73	3.91	2.54	nan	nan	nan	0.94	0.93	0.91	1.79	1.77	1.65
Lumajangdong	1399	81.62	34.02	347.02	45.1	4.79	1.3	0.98	0.36	8.13	0.46	11.72	40.68	5.98	nan	nan	nan	1.47	1.38	1.43	5.47	5.73	5.25
Gyeze Caka	1401	80.9	33.95	105.06	19.7	4.52	1.71	0.97	0.32	6.92	nan	10.47	11	3.23	nan	nan	nan	1.36	1.27	1.33	5.53	5.49	5.2
-	1402	88.59	33.85	101.5	12.8	5.02	0.58	0.64	0.04	1.81	nan	3.15	3.2	2.38	nan	nan	nan	0.64	0.59	0.64	2.8	2.91	2.71
Bangong	1403	79.64	33.6	332.93	50	4.22	1.9	0.88	0.12	2.52	1.28	7.1	23.65	4.43	nan	nan	nan	0.92	0.89	0.91	2.58	2.73	2.61
Migriggyangzham	1404	90.27	33.45	472.55	25.7	4.92	0.64	0.79	0.09	3.79	0.76	8.41	39.76	9.13	nan	nan	nan	0.76	0.71	0.75	3.57	3.49	3.55
Dorsoidong	1405	89.86	33.4	378.99	20	4.92	0.6	0.72	0.06	2.86	0.61	4.74	17.97	6.4	nan	nan	nan	0.68	0.63	0.66	2.63	2.44	2.67
Yaggain Canco	1411	89.79	33.02	106.31	5.1	4.87	0.36	0.71	0.08	4.92	nan	5.89	6.26	3.13	nan	nan	nan	0.81	0.78	0.81	3.95	4.35	4.63
-	1419	89.98	32.45	149.16	8.2	4.6	0.88	0.7	0.1	4.43	1.82	5.31	7.93	4.14	nan	nan	nan	0.92	0.87	0.9	3.67	3.78	3.8
Namru	1422	90.86	32.08	207.16	12.7	4.54	1.06	0.82	0.18	8.21	1.18	7.97	16.52	6.34	nan	nan	nan	0.96	0.89	0.97	5.23	4.97	5.58
Na	1424	91.48	32.03	188.28	33.7	4.58	0.88	0.76	0.07	2.65	nan	5.44	10.24	5.85	nan	nan	nan	0.83	0.78	0.82	2.08	2.01	2.22
Ta-tse	1425	87.54	31.9	251.56	8.5	4.47	0.97	0.93	0.33	10.01	2.04	11.46	28.83	5.77	nan	20.5	0.01	1.24	1.17	1.24	6.45	6.6	6.38
Bangkog	1426	89.51	31.75	121.64	6.1	4.52	0.51	0.63	0.02	2.63	nan	0.34	0.42	2.4	nan	nan	nan	0.77	0.71	0.74	3.01	2.9	3.05
Dogen	1427	91.16	31.71	134.17	11.9	4.54	1.12	0.77	0.1	3.89	nan	6.27	8.41	3.9	nan	nan	nan	0.94	0.88	0.93	2.52	2.4	3.07
Dagze	1428	88	31.72	346.7	19.2	4.55	1.18	0.62	0.05	3.71	0.62	1.65	5.73	4.3	nan	nan	nan	0.65	0.6	0.64	1.89	1.78	1.84
Ngoin	1429	88.72	31.58	267.15	37.9	4.54	1.23	0.65	0.05	2.84	0.76	1.54	4.12	4.23	nan	nan	nan	0.77	0.73	0.75	5.74	5.33	5.9
Ngangla Ringco	1431	83.08	31.54	498.06	10	4.76	1.69	1.43	0.81	7.85	0.56	17.41	86.71	9.48	nan	nan	nan	1.96	1.89	1.92	6.21	6.18	5.97
P'eng-Ts'o	1433	90.97	31.51	148.14	12.2	4.52	1.08	0.82	0.15	5.04	14.2	7.28	10.79	4.98	nan	nan	nan	1.03	0.96	1.03	3.19	3.12	3.44
Cha-pu-yeh ch'a-k'a	1437	84.06	31.41	146.74	2.3	4.42	1.6	0.89	0.29	6.17	nan	9.93	14.57	3.49	nan	nan	nan	1.04	1	1.03	3.96	4.05	4.53
Ko-jen	1439	88.34	31.12	477	32.1	4.63	1.65	0.59	0.04	2.55	2.05	1.66	7.92	5.05	nan	nan	nan	0.65	0.62	0.64	3.97	3.77	3.9
Pa-Mu-Ts'o	1440	90.58	31.25	200.64	18.3	4.55	0.86	0.93	0.26	7.45	nan	11.68	23.44	6.07	nan	nan	nan	1.43	1.36	1.4	7.87	7.41	8.42
Bong	1441	91.16	31.22	144.14	38.3	4.66	0.82	0.72	0.05	2.74	nan	4.63	6.67	4.04	nan	nan	nan	1.02	0.98	1.01	4.03	3.92	4.1
Jen-ch'ing hsiu-pu-ts'o	1442	83.45	31.28	182.53	18.8	4.75	1.68	0.68	0.11	1.63	2.91	0.08	0.14	3.71	nan	nan	nan	1.01	0.94	0.98	2.52	2.68	2.38
-	1443	84.96	31.24	105.95	11.3	4.62	1.19	0.66	0.09	2.81	nan	1.64	1.74	2.34	nan	53.4	24.85	0.81	0.74	0.8	1.78	1.78	1.76
Kuo-mang	1444	89.2	31.21	101.75	14.6	4.61	0.81	0.64	0.05	1.67	nan	3.1	3.16	2.68	nan	nan	nan	0.79	0.74	0.77	3.17	3.15	3.2
T'a-jo	1445	84.12	31.14	473.71	34.1	4.56	1.54	0.69	0.05	2.5	1.58	3.59	17.01	6.38	nan	nan	nan	0.71	0.69	0.7	1.78	1.98	1.61
Ang-tzu	1447	87.14	31.03	389.33	8.7	4.69	1.19	0.78	0.14	5.21	3.37	5.19	20.21	5.63	nan	nan	nan	0.93	0.89	0.93	6.41	5.45	7.89
-	1448	89.67	30.93	102.74	5.3	4.65	0.86	0.63	0.05	2.27	10.97	2.89	2.97	2.51	nan	nan	nan	0.85	0.81	0.84	2.69	2.5	2.75
Zhari Namco	1449	85.62	30.93	958.1	25	4.6	1.13	0.85	0.22	6.28	1.29	7.17	68.7	10.27	nan	41.55	0.08	1.17	1.12	1.14	4.5	4.76	4.34
Tangra	1450	86.61	31.07	825.06	120	4.49	1.91	1.01	0.39	9.07	0.66	10.97	90.48	10.28	nan	87.6	0.02	1.5	1.41	1.48	7.21	7.05	7.6
P'a-lung	1451	83.58	30.89	141.17	15.1	5.18	1.25	0.76	0.2	5.08	5.34	3.13	4.42	3.36	nan	nan	nan	0.93	0.88	0.91	2.33	2.43	2.21
Ma-p'ang yung-ts'o	1454	81.47	30.68	413.6	44.8	4.58	2.88	0.86	0.07	2.29	nan	4.57	18.9	6.29	nan	38.15	4.3	0.84	0.79	0.84	2.14	1.52	3.09
Hsu-ju	1457	86.41	30.29	205.49	36.3	4.71	1.56	0.73	0.15	3.94	0.79	4.42	9.09	3.67	nan	nan	nan	0.82	0.76	0.82	2.45	2.23	2.72
-	1459	84.8	30.21	141.9	37.9	5.19	1.06	0.66	0.13	6.58	nan	2.67	3.78	2.45	nan	nan	nan	0.87	0.81	0.88	2.84	2.73	3.08
-	1465	85.72	29.84	110.98	18.3	5.13	0.91	0.67	0.1	5.97	nan	2.86	3.18	1.88	nan	nan	nan	1.08	1.03	1.1	7.82	7.07	8.46
P'ei-k'u t'so	1474	85.59	28.89	277.69	58.3	4.56	1.95	1.29	0.44	8.4	0.62	12.59	34.95	5.09	nan	nan	nan	1.61	1.5	1.58	5.93	5.73	5.71
P'u-mo-ts'o	1477	90.4	28.57	283.19	36.4	5	1.21	0.73	0.08	2.27	0.58	5.37	15.21	4.7	nan	nan	nan	0.73	0.7	0.71	0.59	0.57	0.59
-	14735	93.41	37.7	64.61	1.3	2.67	0.21	0.64	0.05	1.7	nan	1.87	1.21	1.55	nan	nan	nan	0.7	0.65	0.68	2.68	2.54	2.66
-	14748	95.51	37.49	61.76	3.2	3.15	1.51	0.83	0.07	3.61	nan	6.16	3.8	2.16	nan	nan	nan	0.83	0.75	0.84	3.53	3.33	3.92
-	14765	96.9	37.28	54.33	1.7	2.8	1.8	0.83	0.03	0.71	nan	4.57	2.48	2.23	nan	nan	nan	0.78	0.73	0.77	1.26	1.19	1.4
-	14789	94.3	37.06	99.26	1.6	2.67	0.04	0.74	0.07	2.64	nan	4.13	4.1	3.15	nan	nan	nan	0.79	0.72	0.8	3.59	3.91	3.45
-	14795	98.2	36.94	99.91	1.8	2.92	1.55	0.79	0.04	2.17	nan	4.49	4.49	2.58	nan	nan	nan	0.74	0.69	0.73	1.46	1.6	1.23
Bei Hulsan	14800	95.93	36.91	82.42	1.6	2.66	0.83	0.73	-0.03	0.44	nan	2.23	1.84	2.49	nan	nan	nan	0.65	0.61	0.63	1.58	1.72	1.55
-	14845	88.77	36.01	80.39	7.8	4.84	0.75	0.72	0.02	4.43	nan	5.42	4.36	2.62	nan	nan	nan	0.84	0.77	0.84	3.38	3.16	3.48
-	14864	89.42	35.8	87.44	10.5	4.85	0.87	0.79	0.04	1.62	nan	6.62	5.78	3.49	nan	nan	nan	0.83	0.77	0.81	2.24	2.11	2.49
-	14872	91.37	35.7	53.69	8	4.88	0.76	0.8	0.03	1.18	nan	5.63	3.02	2.11	nan	nan	nan	0.88	0.82	0.86	2.43	2.15	2.35
-	14878	90.62	35.6	99.99	17.4	4.91	0.99	0.92	0.13	3.03	nan	10.96	10.96	3.94	nan	nan	nan	0.91	0.88	0.9	1.71	1.82	1.78
-	14884	82.75	35.56	91.01	9.9	5.03	1.2	0.7	0.06	1.81	nan	2.05	1.87	2.17	nan	nan	nan	1.01	0.94	0.98	1.99	2.24	2.04
-	14894	84.65	35.43	59.34	6.2	4.76	0.46	0.66	-0.01	2.18	nan	2.82	1.67	1.44	nan	nan	nan	0.74	0.68	0.74	3.11	3	3.46
-	14895	88.37	35.41	64.77	3.2	4.81	1.15	0.73	0.1	2.97	nan	6.59	4.27	2.41	nan	nan	nan	0.65	0.61	0.65	2.54	2.73	2.67
-	14898	91.86	35.33	53.86	3.7	4.75	0.59	0.78	0.05	1.98	nan	6.19	3.33	2.6	nan	nan	nan	0.69	0.66	0.67	1.71	1.95	1.72
-	14901	83.12	35.3	86.02	7.6	4.88	0.59	0.77	0.05	1.93	2.24	4.97	4.27	2.6	nan	nan	nan	0.89	0.82	0.86	2.5	2.43	2.57
-	14908	90.53	35.2	51.96	4.3	4.77	0.52	0.83	0.01	2.02	3.36	7.57	3.93	2.34	nan	nan	nan	0.95	0.87	0.93	1.61	1.37	1.77
-	14913	86.74	35.13	81.87	3.2	4.78	0.69	0.62	-0.01	2.18	nan	2.53	2.07	1.74	nan	nan	nan	0.62	0.58	0.62	3.45	3.77	4.36
-	14914	90.54	35.07	65.1	4.3	4.79	0.45	0.84	0.03	2.21	nan	7	4.55	2.96	nan	nan	nan	0.94	0.89	0.92	1.91	2.03	1.96
-	14940	92.22	34.81	53.82	3.7	4.78	0.62	0.65	0.01	1.68	nan	2.28	1.23	1.74	nan	nan	nan	0.66	0.62	0.65	2.77	2.8	2.87
-	14943	81.89	34.74	71.81	7.5	5.03	0.66	0.87	0.07	1.79	nan	6.99	5.02	2.74	0.3733	nan	nan	0.96	0.89	0.93	1.7	1.5	1.97
-	14948	79.69	34.68	50.75	4.7	5.18	0.92	0.75	0	0.53	nan	3.38	1.72	1.55	nan	nan	nan	0.81	0.76	0.8	0.75	0.75	0.88
-	14952	88.7	34.65	66.84	6.6	4.81	0.45	0.69	0.07	4.53	nan	3.55	2.37	1.61	nan	nan	nan	0.8	0.73	0.79	3.22	3	3.49
Lung Mu	14954	80.45	34.61	97.7	10.6	4.99	1.38	0.71	-0.01	0.7	nan	3.79	3.7	2.24	nan	nan	nan	0.89	0.83	0.86	1.82	1.68	1.84
Orba	14959	81.04	34.53	91.22	21.5	5.19	1.28	0.76	0.14	1.62	nan	4.02	3.67	3.21	nan	nan	nan	0.93	0.9	0.89	2.76	2.95	2.57
-	14966	81.79	34.48	61.08	9.9	5.08	1.2	0.69	0.02	0.43	nan	1.25	0.76	1.94	nan	nan	nan	0.75	0.69	0.72	0.65	0.62	0.58
-	14972	81.94	34.44	61.93	16.1	5.09	1.19	0.79	0.07	0.73	nan	2.58	1.6	2.04	nan	nan	nan	0.93	0.88	0.9	1.35	1.33	1.27
-	14977	85.77	34.4	87.28	35.1	5.16	1.17	0.71	0.12	3.72	nan	1.02	0.89	1.63	0.3033	nan	nan	1.13	1.04	1.11	5.22	5.08	5.74
-	14984	85.23	34.34	57.48	9.4	4.87	1.06	0.72	0.1	4.5	nan	3.23	1.86	1.85	nan	nan	nan	1.04	0.98	1	4.63	4.64	4.83
-	14988	91.59	34.34	67.75	7.3	4.67	0.55	0.68	0.01	1.7	nan	4.44	3.01	2.09	nan	nan	nan	0.65	0.61	0.63	0.58	0.5	0.64
-	15008	89.95	34.01	65.27	12.9	4.99	0.57	0.73	0.07	3.65	nan	5.43	3.55	2.57	nan	nan	nan	0.88	0.8	0.88	1.95	1.75	2.59
-	15013	91.2	33.89	80.93	9.8	4.9	0.71	0.74	-0.01	1.99	nan	4.32	3.5	3.07	nan	nan	nan	0.72	0.7	0.72	1.27	1.66	1.43
-	15014	87.02	33.86	67.52	2.3	4.83	0.48	0.58	0	1.3	nan	1.18	0.8	1.4	nan	nan	nan	0.62	0.57	0.6	2.12	2.08	2.08
-	15023	90.01	33.73	58.51	10.1	4.95	0.52	0.7	0.02	1.1	nan	3.07	1.79	2.41	nan	nan	nan	0.8	0.75	0.77	2.14	2.06	2.11
-	15026	89.71	33.63	63.34	5.4	4.94	1.04	0.66	0.02	1.32	nan	2.62	1.66	1.95	nan	nan	nan	0.66	0.61	0.64	1.6	1.54	1.77
-	15029	78.91	33.53	55.2	29.4	4.29	1.79	0.84	0.05	1.19	nan	3.71	2.05	1.48	nan	nan	nan	0.48	0.47	0.47	-0.16	0.15	-0.2
-	15031	102.81	33.45	65.11	3.8	3.45	0.33	0.83	0.01	1.76	nan	3.13	2.04	1.64	nan	nan	nan	0.85	0.85	0.84	1.3	1.41	1.29
-	15062	88.7	32.98	57.1	2.5	4.79	1.31	0.64	0.01	0.61	nan	2.96	1.69	1.82	nan	nan	nan	0.62	0.57	0.62	0.47	0.31	0.52
-	15063	86.75	32.98	64.98	1.7	4.55	1.39	0.59	-0.01	0.94	6.45	2.31	1.5	1.34	nan	nan	nan	0.58	0.55	0.56	1.1	1.12	1.1
-	15079	81.74	32.76	55.66	15	4.42	1.39	0.69	0.06	3.7	nan	3.43	1.91	1.72	nan	nan	nan	0.89	0.83	0.86	1.7	1.75	1.44
-	15112	88.05	32.39	66.15	4.3	4.69	1.3	0.66	0.11	3.48	nan	3.46	2.29	1.77	1.1317	23.5	0.1	0.76	0.7	0.76	1.88	2.04	1.68
Dong	15132	84.73	32.18	73.78	2.9	4.39	1.27	0.65	0.07	2.54	3.16	3.66	2.7	1.97	nan	31.05	0.06	0.82	0.76	0.8	1.45	1.51	1.63
Cam	15135	83.54	32.12	93.44	5.8	4.34	1.89	0.56	0.02	1.85	nan	0.02	0.02	1.59	nan	11.55	0.69	0.59	0.55	0.59	1.49	1.5	1.55
Lagkor	15142	84.13	32.03	93.66	22.9	4.46	1.27	0.96	0.4	10.07	nan	10.87	10.18	3.05	nan	nan	nan	1.48	1.42	1.45	7.45	8.02	7.56
-	15146	88.23	32	61.22	4.9	4.51	1.16	0.59	0.02	1.37	nan	0.54	0.33	1.39	nan	nan	nan	0.72	0.66	0.7	2.21	2.11	2.2
-	15160	83.18	31.85	60.2	7.1	4.73	1.6	0.62	0.07	1.36	nan	0.02	0.01	1.42	nan	nan	nan	0.83	0.8	0.79	2.42	2.54	2.42
Ch'a-erh-ku-t'e	15163	88.26	31.82	88.15	30.7	4.55	0.68	0.56	-0.03	1.9	nan	0.5	0.44	1.39	nan	nan	nan	0.82	0.76	0.79	3.8	3.67	3.69
-	15166	90.4	31.78	54.5	5	4.61	0.84	0.62	0.01	2.66	nan	2.3	1.25	1.86	nan	nan	nan	0.87	0.81	0.89	2.43	2.89	2.46
-	15169	90.74	31.7	58.8	6.8	4.68	0.92	0.68	0.03	1.17	nan	2.15	1.27	1.86	nan	nan	nan	0.93	0.85	0.92	2.61	2.48	2.43
-	15175	82.33	31.63	53.09	8.6	5.07	1.03	0.72	0.05	1.37	nan	3.58	1.9	1.53	nan	nan	nan	0.95	0.89	0.93	1.93	1.76	1.91
-	15178	87.28	31.58	54.89	8.8	4.59	1.25	0.63	0.03	1.93	nan	2.08	1.14	1.43	nan	nan	nan	0.8	0.76	0.77	3.01	3.05	2.87
-	15180	86.74	31.57	54.07	8.8	4.46	1.75	1	0.43	7.05	nan	5.4	2.92	1.97	nan	nan	nan	1.28	1.18	1.26	6.15	5.95	6.22
-	15191	91.51	31.47	70.3	4.8	4.51	1.04	0.73	0.05	2.31	nan	4.22	2.96	3.11	nan	nan	nan	1.05	1.03	1.01	2.91	3.06	2.74
-	15197	87.9	31.37	72.23	25.8	4.65	1.19	0.55	-0.01	1.67	nan	0.85	0.61	1.18	nan	nan	nan	0.74	0.68	0.73	2.88	2.75	2.96
-	15208	91.47	31.3	75.95	3.5	4.51	1.03	0.74	0.05	1.43	nan	4.15	3.15	3.17	nan	nan	nan	1.19	1.11	1.17	3.6	3.14	3.6
Mo-k'o-yu	15232	89.01	31.05	81.23	10	4.66	0.87	0.56	-0.02	1.2	nan	0.55	0.45	1.48	nan	nan	nan	0.55	0.52	0.55	0.83	0.77	1.01
-	15245	82.24	30.98	58.45	10.8	5.18	1.15	0.77	0.1	2.21	nan	4.81	2.81	1.64	nan	nan	nan	1.03	0.99	0.99	1.48	1.4	1.39
-	15252	87.46	30.98	70.76	7	4.7	0.97	0.62	0	0.98	nan	2.74	1.94	1.36	nan	nan	nan	0.75	0.69	0.76	1.22	1.13	1.85
-	15257	89.83	30.93	56.08	4.8	4.65	0.83	0.64	0.04	1.01	nan	3.65	2.04	1.89	nan	nan	nan	0.83	0.78	0.81	2.25	2.02	2.22
-	15265	84.95	30.77	65.39	20.1	4.65	1.17	0.66	0.06	3.37	nan	1.88	1.23	1.46	nan	nan	nan	0.89	0.86	0.86	1.95	2.14	1.82
-	15267	84.79	30.8	60.05	17.3	4.65	1.22	0.72	0.11	4.79	nan	2.09	1.25	1.92	nan	nan	nan	1.32	1.26	1.28	3.11	3.04	2.37
-	15276	82.13	30.64	58.81	6.6	4.76	1.14	0.77	0.06	2.09	nan	4.44	2.61	1.86	nan	nan	nan	0.99	0.93	0.95	1.84	1.84	1.45
-	15277	86.22	30.67	84.68	15.5	4.67	1.73	0.83	0.2	4.11	nan	5.83	4.94	2.46	nan	nan	nan	0.99	0.94	1.03	2.87	2.84	3.33
Mu-ts'o-ping-ni	15278	86.31	30.61	59.3	30.8	4.68	1.73	0.82	0.21	3.62	nan	4.39	2.6	2.03	nan	nan	nan	1.06	1.03	1.04	3.13	3.43	3.02
Tajo-Tzo	15292	84.06	30.44	81.06	10.4	5.38	0.89	0.49	-0.04	0.45	nan	0	0	nan	nan	nan	nan	0.78	0.73	0.75	2.97	2.75	2.87
-	15296	88.61	30.47	68.93	6.7	4.8	1.18	0.67	0.11	2.24	nan	4.73	3.26	2.19	0.1517	nan	nan	1.06	1.05	1.04	2.49	2.72	2.61
-	15405	91.67	28.67	61.67	5.1	4.6	0.87	0.7	0.01	0.44	nan	3.36	2.07	2.14	nan	nan	nan	0.49	0.49	0.48	0.4	0.6	0.24
-	15424	89.35	28.14	62.15	4.4	4.47	1.83	0.73	0.06	1.55	nan	4.05	2.52	1.97	nan	nan	nan	0.71	0.67	0.69	2.21	2.05	2.18
The location and area data are from the HydroLAKES database (http://wp.geog.mcgill.ca/hydrolab/, last access: 12/01/2021).
The elevation data are from the GLOBE Elevation Data (last access: 05/26/2020)
The chlorophyll concentrations are adopted from Hu, C., et al., 2012 (based on MODIS, last access: 12/02/2021).
Data of GHG emissions are adopted from Yan, F., et al., 2018 (last access: 09/28/2021).
References:
Messager, M.L., Lehner, B., Grill, G., Nedeva, I., Schmitt, O. (2016): Estimating the volume and age of water stored in global lakes using a geo-statistical approach. Nature Communications: 13603. doi: 10.1038/ncomms13603. Data is available at www.hydrosheds.org.
GLOBE Task Team and others (Hastings, David A., Paula K. Dunbar, Gerald M. Elphingstone, Mark Bootz, Hiroshi Murakami, Hiroshi Maruyama, Hiroshi Masaharu, Peter Holland, John Payne, Nevin A. Bryant, Thomas L. Logan, J.-P. Muller, Gunter Schreier, and John S. MacDonald), eds., 1999. The Global Land One-kilometer Base Elevation (GLOBE) Digital Elevation Model, Version 1.0. National Oceanic and Atmo…
Hu, C., Lee Z., and Franz, B.A. (2012). Chlorophyll-a algorithms for oligotrophic oceans: A novel approach based on three-band reflectance difference, J. Geophys. Res., 117, C01011, doi:10.1029/2011JC007395.
Yan, F., Sillanpää, M., Kang, S., Aho, K. S., Qu, B., Wei, D., et al. (2018). Lakes on the Tibetan Plateau as conduits of greenhouse gases to the atmosphere. Journal of Geophysical Research: Biogeosciences, 123, 2091– 2103. https://doi.org/10.1029/2017JG004379
