# Supplementary material for: Unexpected high NOX emissions from lakes on Tibetan Plateau under rapid warming
Source: Research Square preprint supplement (doi:10.21203/rs.3.rs-1980236/v1), 2022-09-02
Supplement: Supplementary file 2 [file 4e1e81089ea4399d81aa111c.docx]

Supplementary Materials for

**Unexpected high NOX emissions from lakes on Tibetan Plateau under rapid warming**

Hao Kong1, Jintai Lin1*, Yuhang Zhang1, Chunjin Li1, Chenghao Xu1, Lu Shen1, Xuejun Liu2, Kun Yang3,4, Hang Su5,6, Wanyun Xu7

1Laboratory for Climate and Ocean-Atmosphere Studies, Department of Atmospheric and Oceanic Sciences, School of Physics, Peking University, Beijing 100871, China

2College of Resources and Environmental Sciences, National Academy of Agriculture Green Development, China Agricultural University, Beijing 100193, China

3Ministry of Education Key Laboratory for Earth System Modeling, Department of Earth System Science, Tsinghua University, Beijing 100084, China

4National Tibetan Plateau Data Center, State Key Laboratory of Tibetan Plateau Earth System and Resource Environment, Institute of Tibetan Plateau Research, Chinese Academy of Sciences, Beijing 100101, China

5Multiphase Chemistry Department, Max Planck Institute for Chemistry, Mainz 55128, Germany.

6Department of Environmental Engineering, Tsinghua University, Beijing 100084, China

7State Key Laboratory of Severe Weather & Key Laboratory for Atmospheric Chemistry of CMA, Institute of Atmospheric Composition, Chinese Academy of Meteorological Sciences, Beijing, 100081, China

*Corresponding author. Email: linjt@pku.edu.cn

This file includesFigures. S1 to S7, References S1 to S4

Other Supplementary Materials for this manuscript include Table S1.xlsx


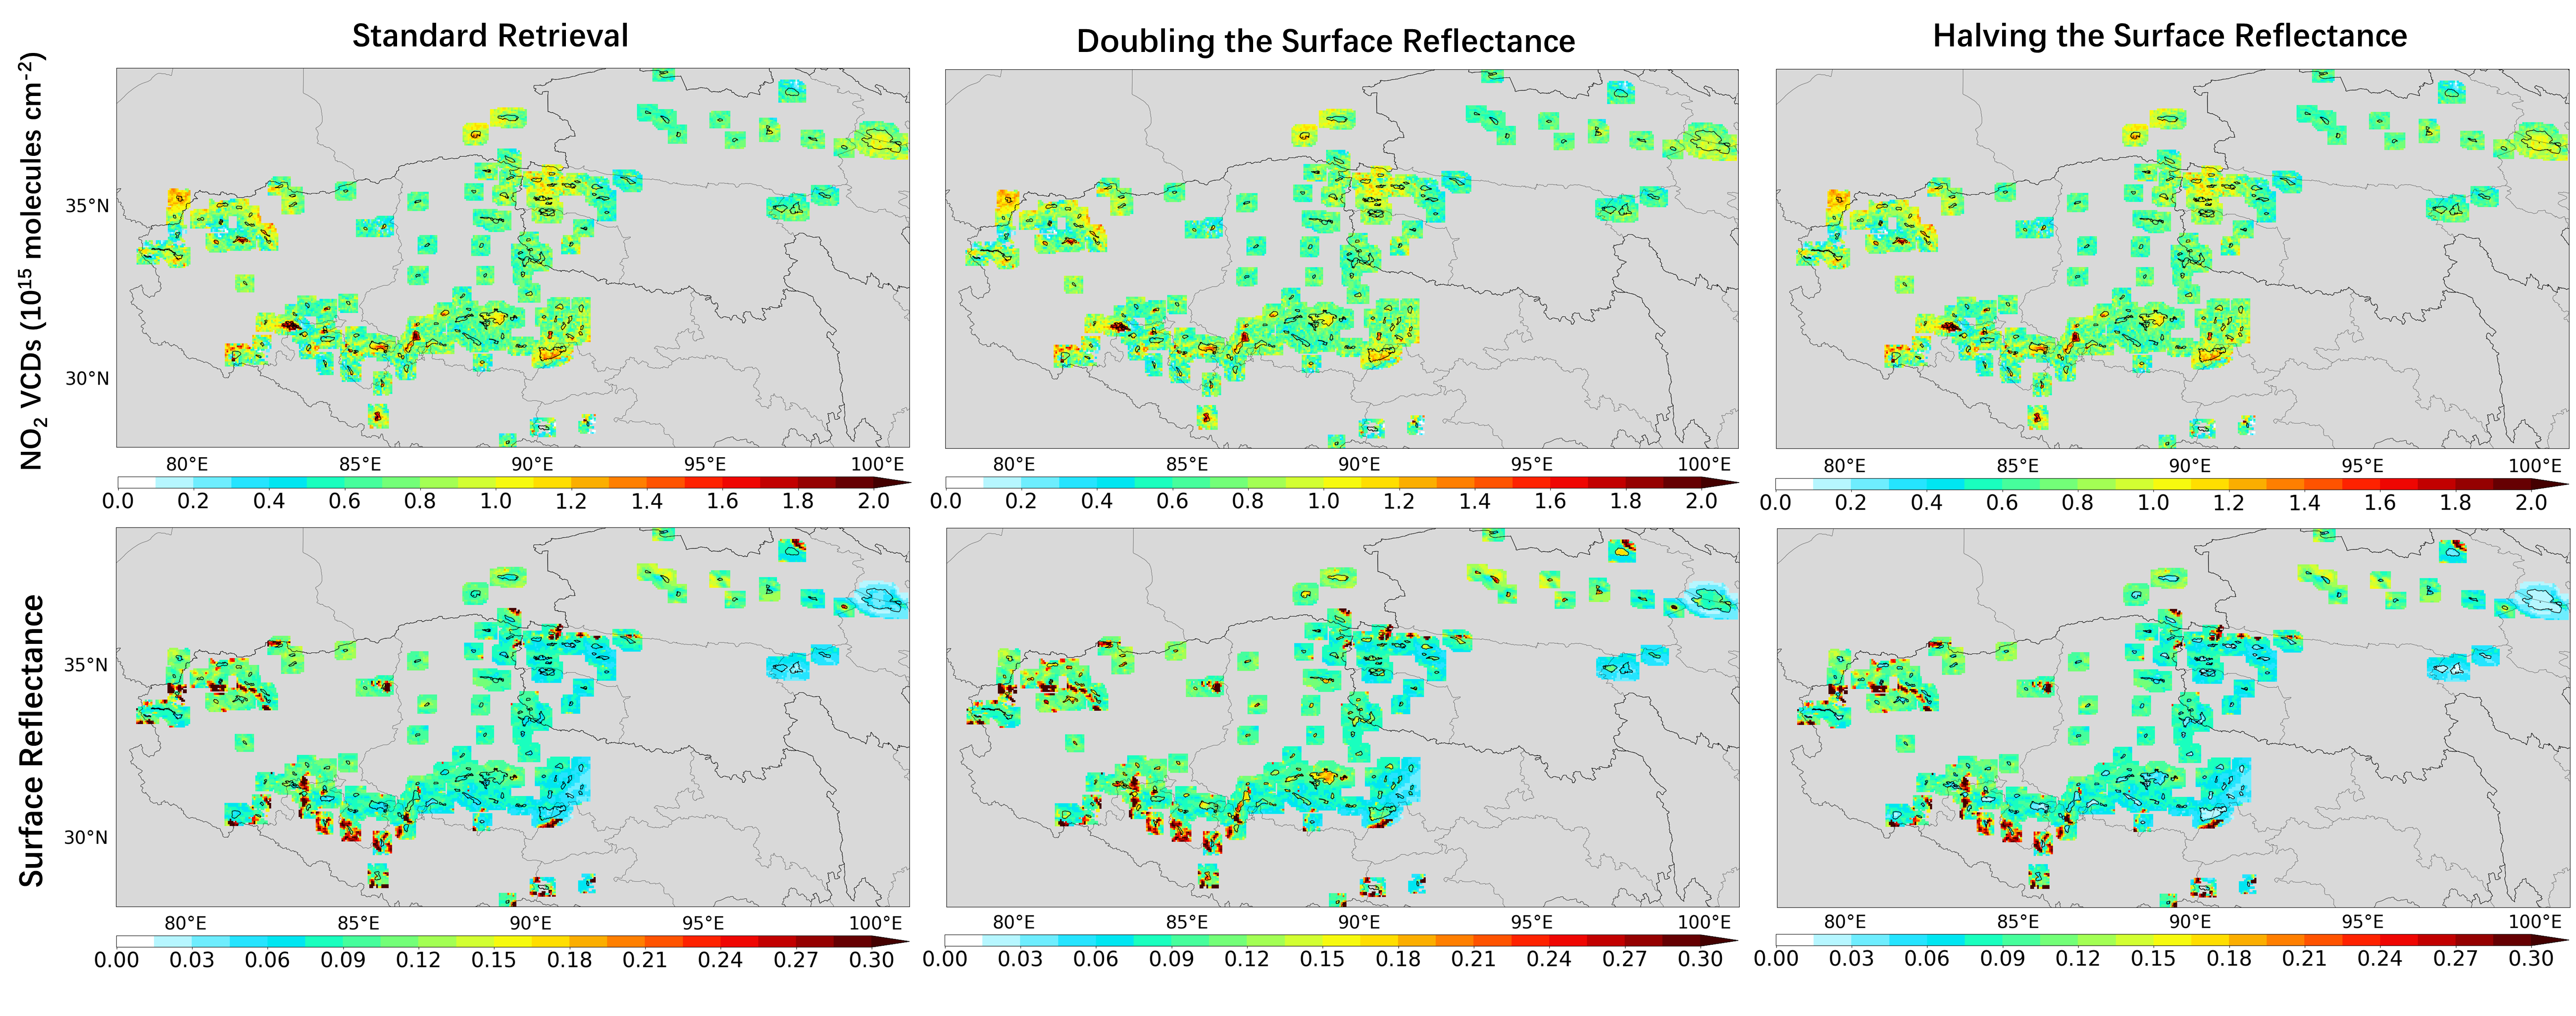
Figure S1. Sensitivity test of NO2 retrieval for July 2019. Left column: standard retrieval. Middle column: retrieval by doubling the surface reflectance. Right column: retrieval by halving the surface reflectance.


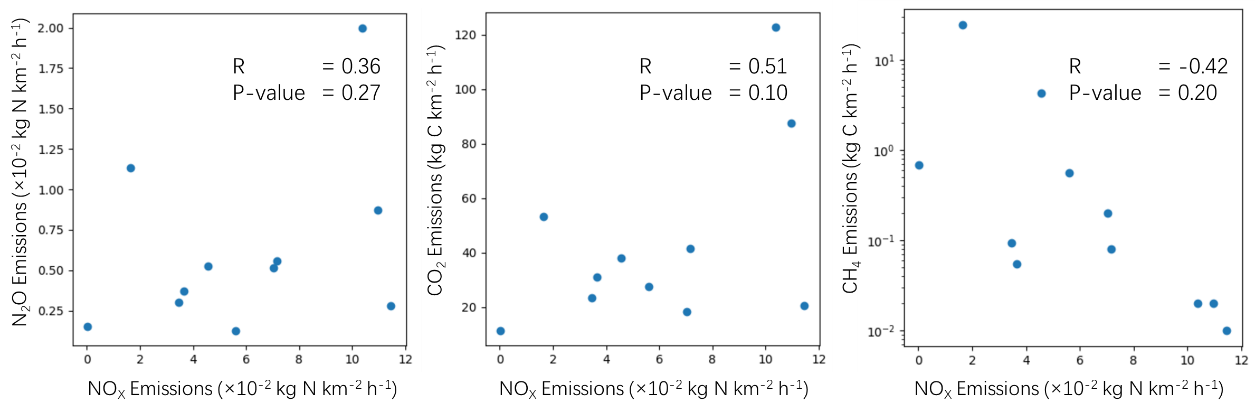


Figure S2. Relating NOx emissions to greenhouse gas fluxes for 11 lakes. Greenhouse gas data are taken from Yan et alS1.


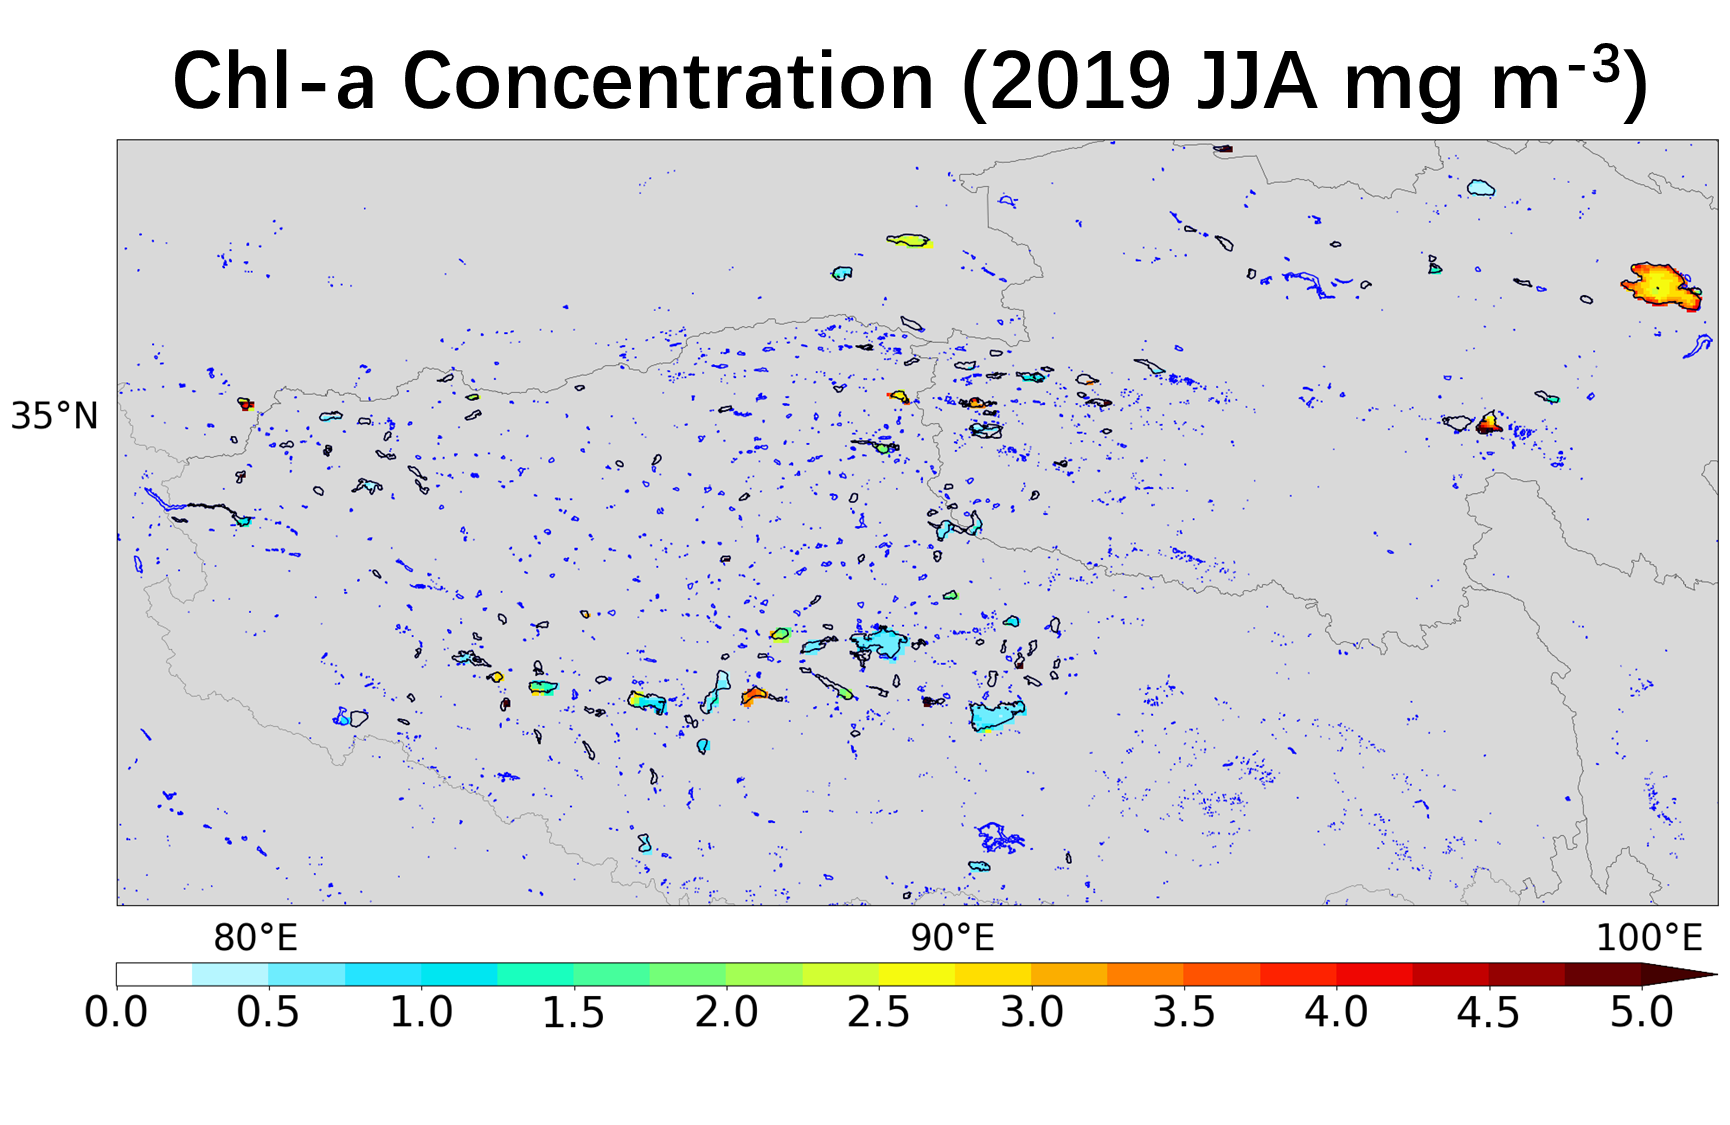


Figure S3. Chl-a concentrations in summer 2019 from MODIS. Data are adopted from the MODIS dataset by the NASA Ocean Biology Processing GroupS2 (last access: 12/02/2021).

**
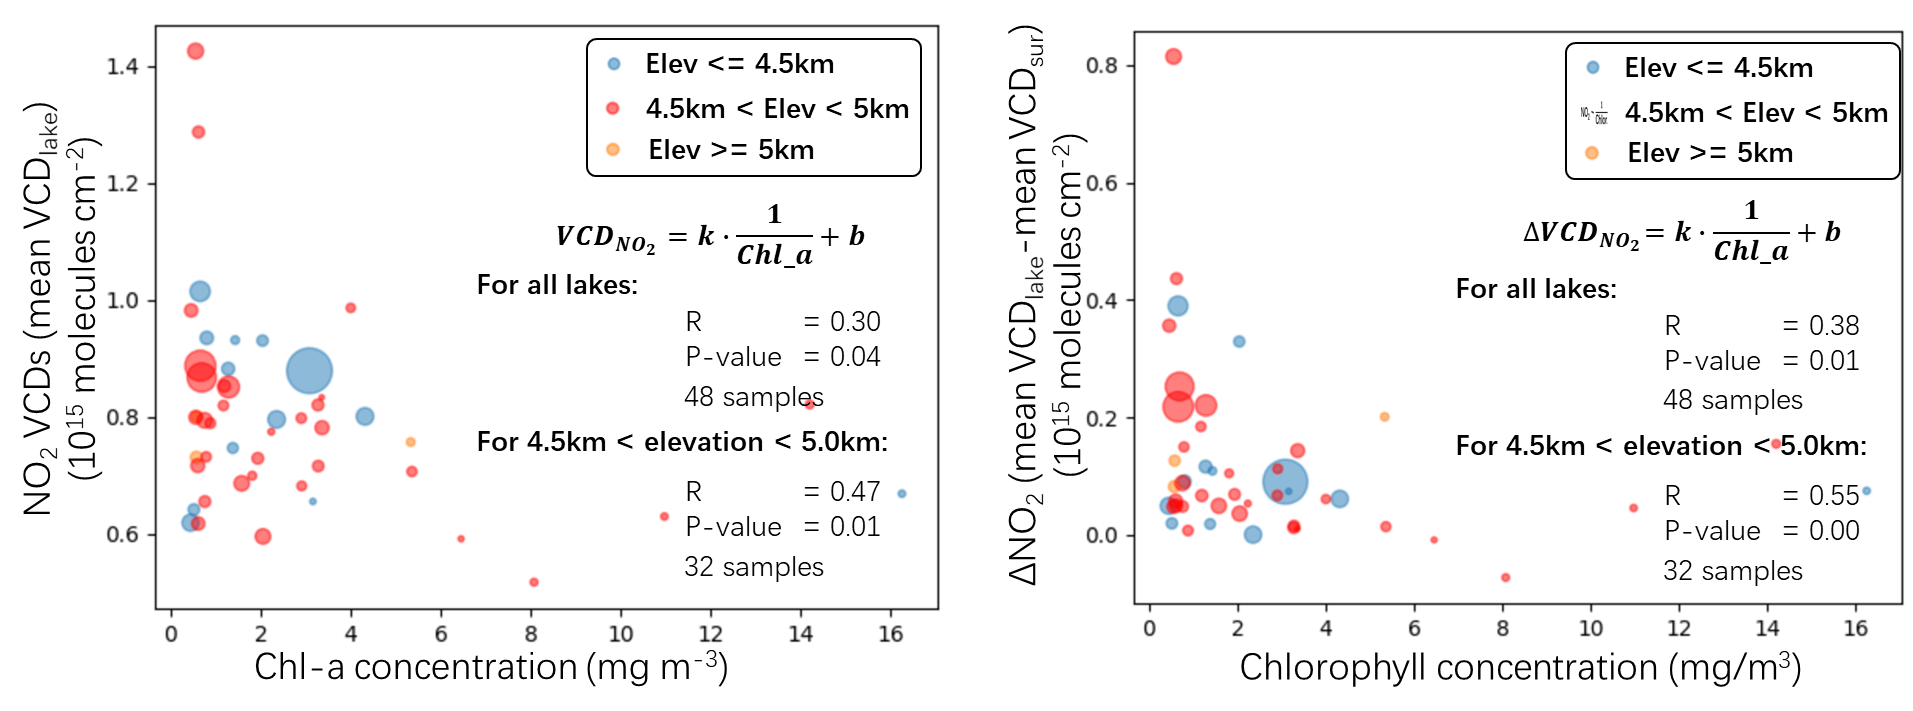
**

Figure S4. Relating NO2 VCDs over lakes to Chl-a concentrations. (a) The scatter plot of the mean NO2 VCDs over the lakes and the mean Chl-a concentrations. (b) The scatter plot of the differences between the mean NO2 VCDs over the lakes and the mean NO2 VCDs over the surroundings (mean(VCDlake) – mean(VCDsur)) and the mean Chl-a concentrations.


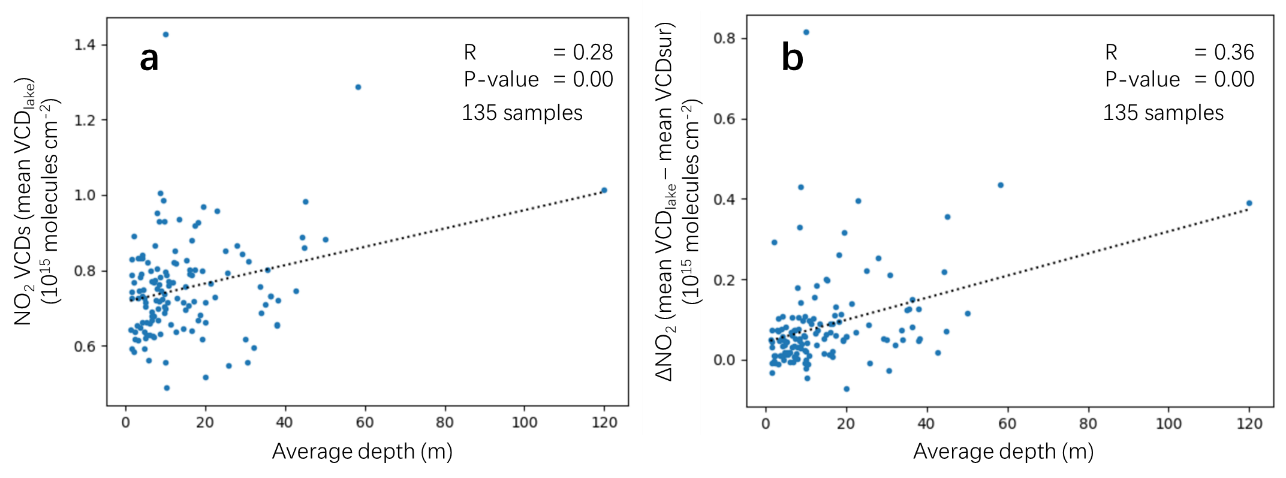


Figure S5. Relating NO2 VCDs over lakes to lake depths. (a) The scatter plot of the mean NO2 VCDs over the lakes and the average lake depths. (b) The scatter plot of the differences between the mean NO2 VCDs over the lakes and the mean NO2 VCDs over the surroundings (mean(VCDlake) – mean(VCDsur)) and the average lake depths.

**
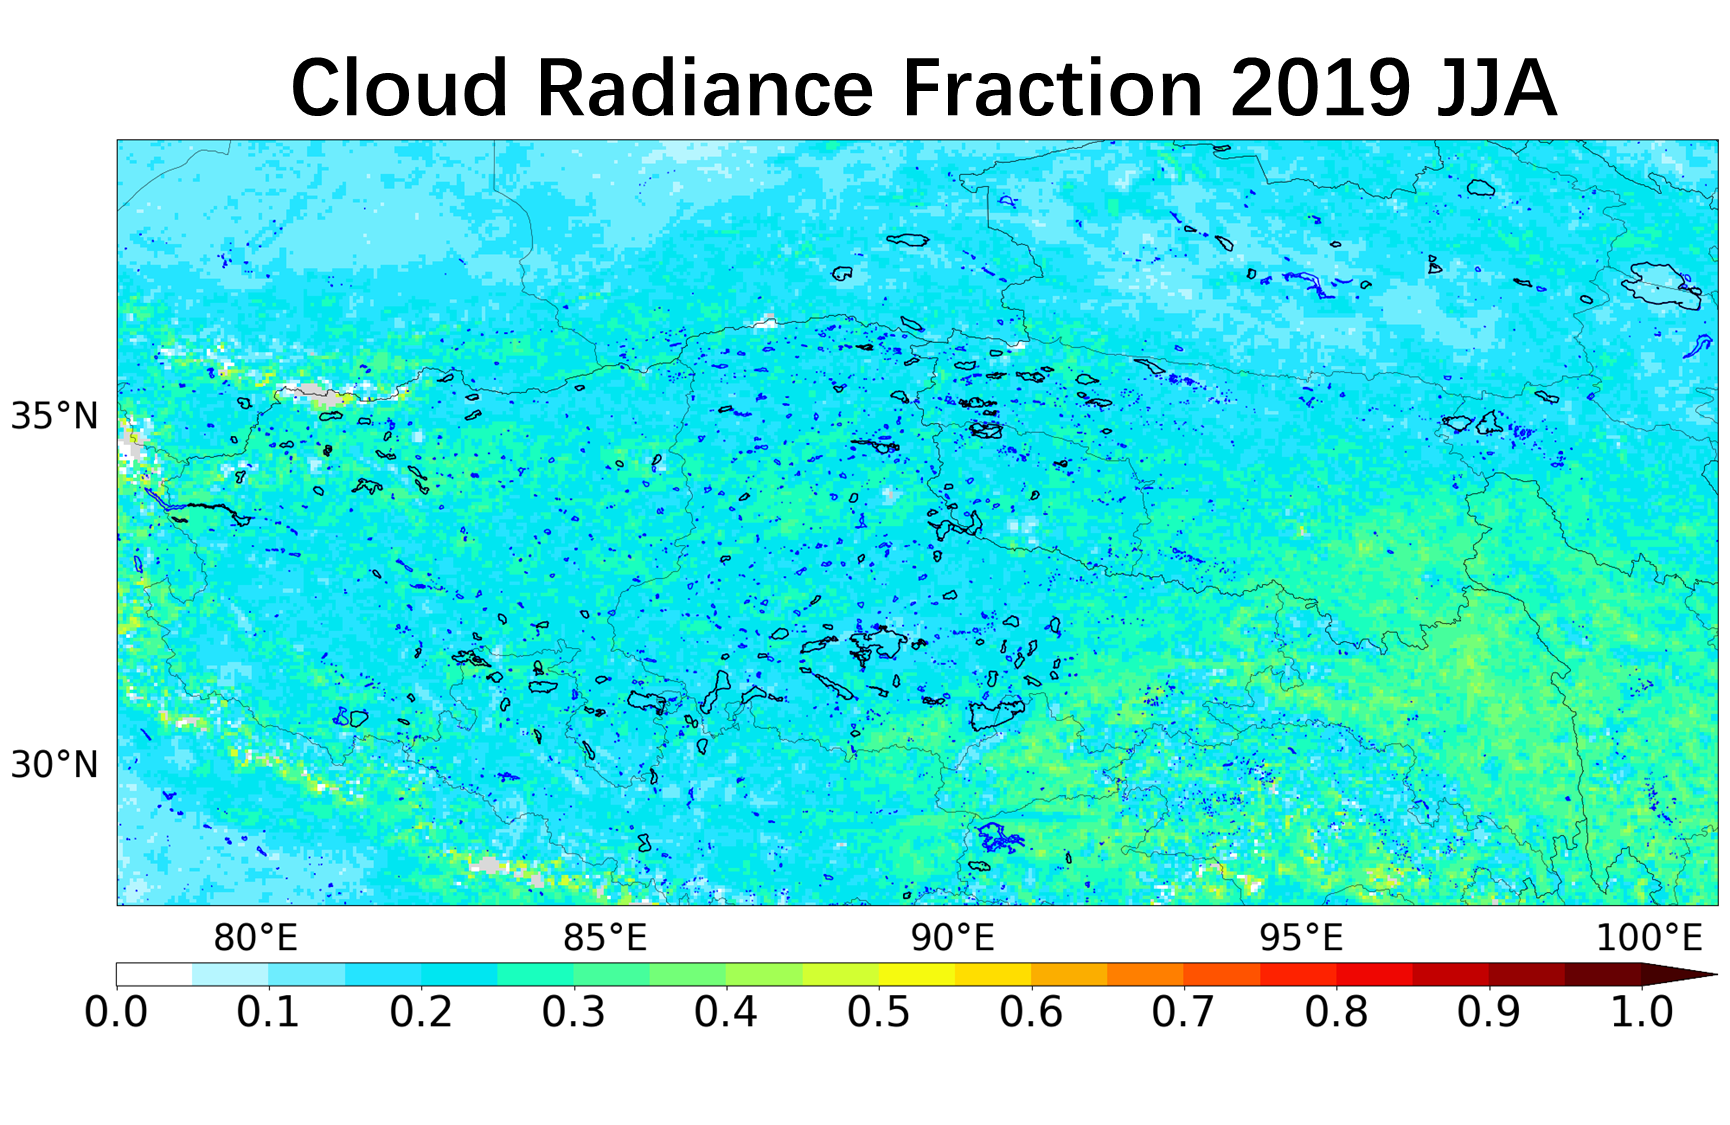
**

Figure S6. Distribution of cloud radiance fraction in summer 2019S3*.* (The 135 lakes in the study are shown with black boundaries and other lakes are shown with blue boundaries).

**
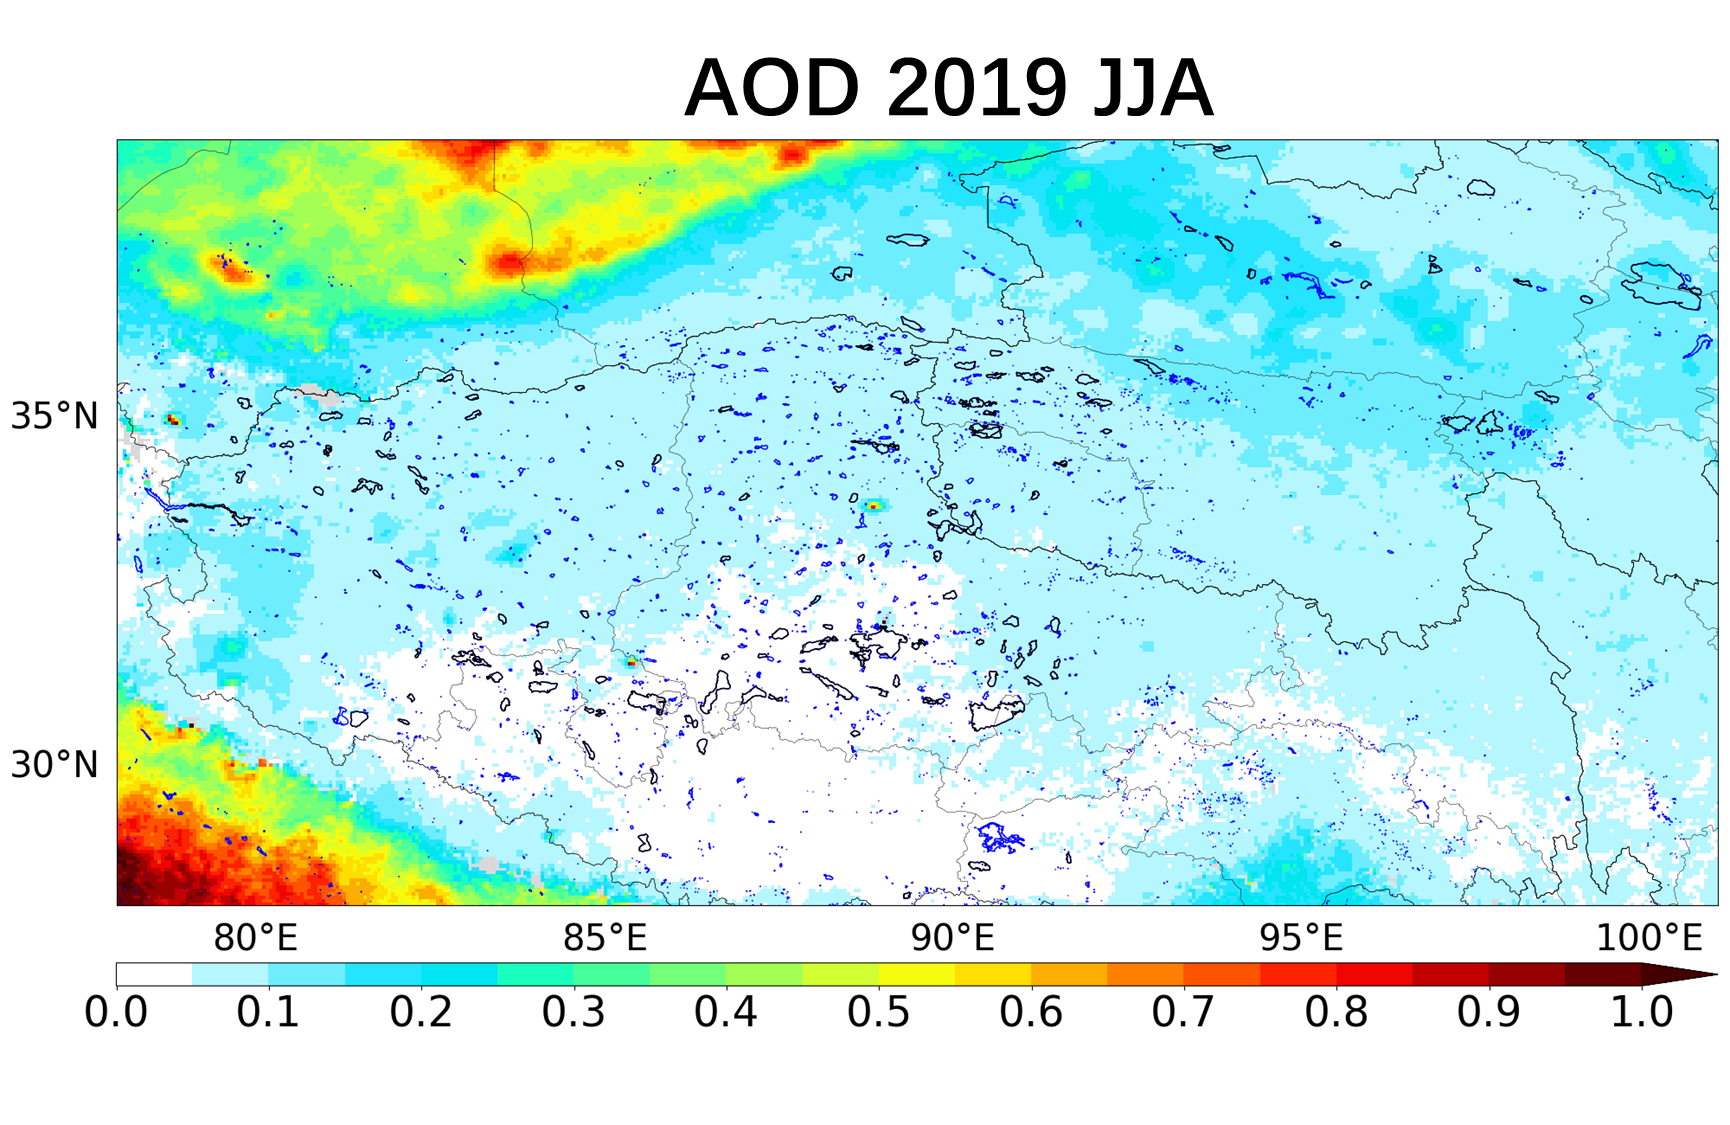
**

Figure S7. Distribution of AOD in summer 2019. Data are taken from MODIS Atmosphere L2 Aerosol ProductS4 (MYD04 Collection 6.1, last access: 12/03/2019).

**References**

S1 Yan, F. *et al.* Lakes on the Tibetan Plateau as Conduits of Greenhouse Gases to the Atmosphere. *Journal of Geophysical Research: Biogeosciences* **123**, doi:10.1029/2017JG004379 (2018).

S2 Hu, C., Lee, Z. & Franz, B. Chlorophyll aalgorithms for oligotrophic oceans: A novel approach based on three-band reflectance difference. *Journal of Geophysical Research: Oceans* **117**, doi:<https://doi.org/10.1029/2011JC007395> (2012).

S3 Liu, M. *et al.* A new TROPOMI product for tropospheric NO2 columns over East Asia with explicit aerosol corrections. *Atmos. Meas. Tech.* **13**, 4247-4259, doi:10.5194/amt-13-4247-2020 (2020).

S4 Levy, R. & Hsu, C. (ed USA Goddard Space Flight Center) (2015).
